# Supplementary material for: The Epigenomic Landscape of Pituitary Adenomas Reveals Specific Alterations and Differentiates Among Acromegaly, Cushing's Disease and Endocrine-Inactive Subtypes
Source: Oxford University Press journal article supplement (doi:10.1158/1078-0432.ccr-17-2206), 2018-07-03
Supplement: 10780432ccr172206-sup-187103_3_supp_4750218_p8jb34.xlsx [file 10780432ccr172206-sup-187103_3_supp_4750218_p8jb34.xlsx]

## Sheet: Clinical data
Name	Age (yrs)	Gender (F/M)	Ethnicity	Diagnosis	WHO grade	Invasive	Refractory	Tumor max diameter (mm)	Drug treatment	WES	Methylation Array	RNA-seq
ACTH.1	47	F	Caucasian	Cushing's disease	I	Non-invasive	No	6	No	Yes	Yes	Yes
ACTH.2	60	F	Caucasian	Cushing's disease	I	Invasive	No	9	No	Yes	Yes	Yes
ACTH.3	45	F	Caucasian	Cushing's disease	I	Non-invasive	Unknown	8	No	Yes	Yes	Yes
ACTH.4	61	F	Caucasian	Cushing's disease	I	Non-invasive	No	7	No	Yes	Yes	Yes
ACTH.5	38	F	Caucasian	Cushing's disease	I	Non-invasive	Unknown	8	No	Yes	Yes	Yes
ACTH.6	31	F	Asian	Cushing's disease	I	Non-invasive	No	8	No	Yes	NA	NA
ACTH.7	70	M	Caucasian	Cushing's disease	I	Invasive	Yes	30	No	Yes	Yes	Yes
ACTH.8	42	F	Caucasian	Cushing's disease	I	Invasive	No	9	No	Yes	Yes	Yes
ACTH.9	43	F	Hispanic	Cushing's disease	I	Invasive	Yes	5	No	Yes	NA	NA
ACTH.10	68	F	Hispanic	Cushing's disease	I	Non-invasive	Unknown	7	No	Yes	NA	NA
ACTH.11	26	M	Hispanic	Silent-corticotroph Adenoma	I	Invasive	Unknown	44	No	Yes	Yes	Yes
ACTH.12	57	F	Asian	Silent-corticotroph Adenoma	I	Invasive	No	18	No	Yes	Yes	Yes
ACTH.13	64	M	Caucasian	Silent-corticotroph Adenoma	I	Invasive	No	17	No	Yes	Yes	Yes
GH.1	54	M	Caucasian	Acromegaly	I	Invasive	No	14	No	Yes	Yes	Yes
GH.2	40	M	Hispanic	Acromegaly	I	Invasive	No	29	No	Yes	Yes	Yes
GH.3	56	F	Caucasian	Acromegaly	I	Non-invasive	No	24	No	Yes	Yes	Yes
GH.4	54	F	Caucasian	Acromegaly	I	Invasive	Unknown	14	No	Yes	NA	Yes
GH.5	38	F	Caucasian	Acromegaly	I	Invasive	No	15	No	Yes	Yes	Yes
GH.6	63	M	Caucasian	Acromegaly	I	Invasive	No	9	No	Yes	NA	NA
GH.7	47	F	Asian	Acromegaly	I	Invasive	Yes	16	No	Yes	Yes	Yes
GH.8	50	M	Caucasian	Acromegaly	II	Invasive	Yes	22	No	Yes	Yes	Yes
GH.9	56	F	Caucasian	Acromegaly	I	Invasive	No	20	No	Yes	Yes	Yes
GH.10	57	F	Hispanic	Acromegaly	I	Invasive	No	19	No	Yes	Yes	Yes
GH.11	51	M	Caucasian	Acromegaly	I	Invasive	No	29	No	Yes	Yes	Yes
GH.12	20	F	Caucasian	Acromegaly	I	Invasive	No	21	No	Yes	Yes	NA
GH.13	57	F	Caucasian	Acromegaly	I	Non-invasive	Yes	18	No	Yes	Yes	Yes
Treated.1	48	M	Caucasian	Acromegaly	I	Non-invasive	Unknown	7	Somatuline	Yes	Yes	Yes
Treated.2	30	M	Caucasian	Acromegaly	I	Invasive	Unknown	23	Somatuline	Yes	Yes	Yes
Treated.3	21	F	Caucasian	Acromegaly	I	Invasive	No	21	Somatuline	Yes	Yes	NA
Treated.4	50	M	Caucasian	Acromegaly	I	Invasive	Yes	36	Sandostatin	Yes	Yes	Yes
Inactive.1	56	M	Caucasian	Endocrine inactive	I	Invasive	No	24	No	Yes	Yes	Yes
Inactive.2	57	M	Asian	Endocrine inactive	I	Non-invasive	Unknown	17	No	Yes	Yes	Yes
Inactive.3	53	M	Hispanic	Endocrine inactive	I	Non-invasive	No	27	No	Yes	Yes	Yes
Inactive.4	46	M	Caucasian	Endocrine inactive	I	Non-invasive	No	17	No	Yes	Yes	Yes
Inactive.5	50	M	African-American	Endocrine inactive	I	Invasive	No	40	No	Yes	NA	Yes
Inactive.8	70	M	African-American	Endocrine inactive	I	Non-invasive	Unknown	24	No	Yes	Yes	Yes
Inactive.9	66	M	Caucasian	Endocrine inactive	I	Invasive	Yes	27	No	Yes	Yes	Yes
Inactive.10	47	F	Caucasian	Endocrine inactive	I	Invasive	No	35	No	Yes	Yes	Yes
Inactive.11	63	M	Caucasian	Endocrine inactive	I	Non-invasive	No	24	No	Yes	Yes	Yes
Inactive.12	51	F	Caucasian	Endocrine inactive	I	Non-invasive	No	27	No	Yes	Yes	Yes
Inactive.13	63	M	Caucasian	Endocrine inactive	I	Invasive	No	31	No	Yes	Yes	Yes
Inactive.14	62	M	Caucasian	Endocrine inactive	II	Invasive	Yes	27	No	Yes	Yes	Yes
Inactive.15	67	M	Caucasian	Endocrine inactive	I	Invasive	Unknown	29	No	Yes	Yes	Yes
Inactive.16	51	M	Caucasian	Endocrine inactive	I	Invasive	No	9	No	Yes	Yes	Yes
Inactive.18	64	M	Caucasian	Endocrine inactive	I	Non-invasive	No	18	No	Yes	Yes	Yes
Inactive.19	65	M	Caucasian	Endocrine inactive	I	Non-invasive	No	13	No	Yes	Yes	Yes
Inactive.20	56	M	Caucasian	Endocrine inactive	I	Non-invasive	Unknown	15	No	Yes	Yes	Yes
Inactive.21	63	M	Caucasian	Endocrine inactive	I	Non-invasive	No	8	No	Yes	NA	NA
