# Supplementary material for: The Epigenomic Landscape of Pituitary Adenomas Reveals Specific Alterations and Differentiates Among Acromegaly, Cushing's Disease and Endocrine-Inactive Subtypes
Source: Oxford University Press journal article supplement (doi:10.1158/1078-0432.ccr-17-2206), 2018-07-03
Supplement: 10780432ccr172206-sup-187103_3_supp_4750221_p8jb3j.xlsx [file 10780432ccr172206-sup-187103_3_supp_4750221_p8jb3j.xlsx]

## Sheet: ACTH.starburst.table
gene	entrez_id	logFoldChange	deltaBeta	feature
CDH8	1006	-8.99365	-0.499895	1stExon
LMX1A	4009	8.47241	-0.482704	Body
BBOX1	8424	7.61177	-0.481557	promoter
C2orf80	389073	-7.14798	0.373578	1stExon
HCN1	348980	7.01326	0.452765	Body
RSPO2	340419	6.8677	0.321838	promoter
SLC6A11	6538	-6.7031	-0.359335	Body
CUX2	23316	6.6459	-0.394239	Body
BEST3	144453	6.62547	-0.586627	1stExon
CHIA	27159	6.56968	0.520403	promoter
POMC	5443	6.52043	-0.672226	promoter
HMP19		-6.48936	-0.312056	promoter
KLK12	43849	6.35627	-0.350523	1stExon
CNKSR3	154043	6.34266	-0.499782	Body
RPE65	6121	-6.11828	0.352872	promoter
ALDOB	229	5.99519	-0.368735	promoter
CRHR1	1394	5.98925	-0.572384	Body
WNT7B	7477	5.97865	-0.33119	Body
SHISA9	729993	5.86557	-0.301601	Body
SLC5A8	160728	-5.80201	-0.44815	promoter
NWD1	284434	5.79908	-0.440913	promoter
TRIM29	23650	5.7097	-0.437381	promoter
TBX19	9095	5.66103	-0.48486	Body
MNX1	3110	5.65827	0.524112	Body
LRRC3B	116135	-5.65652	-0.350627	Body
RD3	343035	-5.6293	0.416758	1stExon
HSPB3	8988	5.6178	-0.549918	1stExon
WDR64	128025	-5.58707	-0.37013	1stExon
PCSK2	5126	-5.57449	-0.3691	Body
CYP3A4	1576	5.54039	-0.412564	promoter
NELL1	4745	5.53029	0.351932	Body
PLAGL1	5325	5.49004	-0.457662	promoter
CHRNE	1145	5.44736	-0.535911	1stExon
FGFR3	2261	5.35209	-0.470006	Body
UNC13C	440279	-5.32725	-0.487793	promoter
ST8SIA5	29906	-5.32146	0.332296	Body
CRYGC	1420	-5.30701	0.510291	promoter
SDK1	221935	5.27924	0.563056	Body
ADRA2A	150	-5.1935	-0.306291	1stExon
GRID2	2895	-5.17161	-0.302586	Body
PLA2G1B	5319	-5.16039	0.310849	promoter
RASD1	51655	5.12206	-0.415081	Body
CDH22	64405	5.08797	0.696561	Body
EPN3	55040	-5.07741	0.382142	1stExon
SEMA7A	8482	-5.0751	0.439903	Body
NPTX1	4884	5.04608	0.478291	Body
MEGF10	84466	-5.00093	-0.307632	1stExon
GATA3	2625	-4.98263	0.680482	Body
MC3R	4159	-4.80838	-0.302095	1stExon
KCNK3	3777	-4.77616	0.546787	Body
